# Supplementary material
Source: publisher figshare collection journal article supplement (https://rs.figshare.com/ndownloader/files/39632400)
Supplement: Supplementary file 1 [file 39632400]

## Sheet: In vivo flight data
Muscle type	Species	Number of trials	Body mass (g)	Thorax diameter (mm)	Average Frequency (Hz)	Average displacement (mm)	Average force (N)	Average number of wing beats per trial	Displacement relative to thorax diameter (%)	Force relative to body weight
Asynchronous	Musca domestica	1	0.018	2.09	139.593	0.0012091	0.00126472	167.511	0.0578519	7.16961
Asynchronous	Musca domestica	1	0.016	1.97	130.511	0.0236559	0.00102742	652.761	1.20081	6.55242
Asynchronous	Musca domestica	1	0.012	1.97	152.341	0.00659788	0.00157011	7619.44	0.334918	13.3512
Asynchronous	Bombus centralis	3	0.129	4.23	163.075	0.0291804	0.00921863	1169.39	0.689843	7.29206
Asynchronous	Bombus centralis	1	0.102	3.77	155.52	0.00687989	0.00614316	5275.12	0.18249	6.14562
Asynchronous	Bombus centralis	1	0.147	4.06	160.764	0.00826566	0.0155064	5615.2	0.203588	10.7639
Asynchronous	Xylocopa californica	2	0.619	7.69	81.0431	0.0128974	0.0408595	787.186	0.167717	6.7356
Asynchronous	Xylocopa californica	1	0.724	7.06	112.676	0.0508415	0.0266982	416.9	0.720134	3.76286
Asynchronous	Xylocopa californica	1	0.74	7.36	95.6836	0.0683036	0.0181431	220.072	0.928038	2.5018
Asynchronous	Xylocopa californica	1	0.841	7.75	108.92	0.0566867	0.0621885	141.596	0.731441	7.5455
Asynchronous	Xylocopa californica	1	0.758	7.52	107.167	0.0398174	0.0806702	342.935	0.529487	10.8597
Asynchronous	Xylocopa californica	1	0.822	7.98	108.182	0.0223803	0.0451332	1330.63	0.280454	5.60271
Asynchronous	Xylocopa californica	2	0.604	7.15	124.361	0.0432404	0.0191097	118.017	0.60476	3.22843
Asynchronous	Xylocopa californica	4	0.844	7.77	104.31	0.0774803	0.0460409	1362.23	0.997172	5.56642
Synchronous	Xylocopa californica	2	0.846	8.04	98.0001	0.0704751	0.0280591	271.298	0.876556	3.38436
Synchronous	Helicoverpa zea	1	0.213	4.32	32.7073	0.0460398	0.00232023	163.536	1.06574	1.11154
Synchronous	Helicoverpa zea	2	0.224	4.44	30.6729	0.0516789	0.00265426	100.845	1.16394	1.20912
Synchronous	Helicoverpa zea	3	0.208	4.9	43.8922	0.0927995	0.0064563	527.051	1.89387	3.16734
Synchronous	Helicoverpa zea	2	0.191	4.75	39.0192	0.0650154	0.0103233	184.194	1.36875	5.51516
Synchronous	Bombus centralis	2	0.226	4.75	40.3755	0.0510784	0.00375283	92.7071	1.07534	1.69443
Synchronous	Agrotis ipsilon	1	0.297	4.76	22.6047	0.0540491	0.00291331	339.071	1.13549	1.00093
Synchronous	Agrotis ipsilon	2	0.293	4.62	35.999	0.0486796	0.00778727	1286.07	1.05367	2.71201
Synchronous	Agrotis ipsilon	2	0.264	4.55	27.6234	0.0765897	0.00363901	730.662	1.68329	1.40655
Synchronous	Agrotis ipsilon	2	0.306	4.88	30.694	0.0444206	0.00279146	451.202	0.910259	0.93086
Synchronous	Manduca sexta	3	2.38	11.2	15.7224	0.0557893	0.0590315	139.478	0.498119	2.53093
Synchronous	Manduca sexta	2	2.43	11.15	16.6964	0.239101	0.103371	459.627	2.1444	4.34075
Synchronous	Manduca sexta	1	2.55	11.22	17.6317	0.115109	0.0895736	206.291	1.02593	3.58438
Synchronous	Manduca sexta	1	2.157	11.02	16.5884	0.198735	0.0393759	111.142	1.8034	1.86275

## Sheet: Thorax Compression Data
Muscle type	Species	Mass (g)	Average Thorax Diameter (taken from in vivo flight data)	Compression amplitude (mm)	Stiffness (N/m)	Normalized Stiffness
Synchronous	Agrotis ipsilon	0.206	4.6	0.134333	477.9	1088.93
Synchronous	Agrotis ipsilon	0.31	4.6	0.133167	545.933	826.627
Synchronous	Agrotis ipsilon	0.253	4.6	0.134167	462.167	857.452
Synchronous	Agrotis ipsilon	0.203	4.6	0.135167	397.833	919.892
Synchronous	Agrotis ipsilon	0.283	4.6	0.132833	523.667	868.561
Synchronous	Helicoverpa zea	0.219	4.7	0.104	511.133	1119.34
Synchronous	Helicoverpa zea	0.169	4.7	0.101	677.567	1922.81
Synchronous	Helicoverpa zea	0.23	4.7	0.0943333	907.533	1892.37
Synchronous	Helicoverpa zea	0.214	4.7	0.094375	666.5	1493.68
Synchronous	Helicoverpa zea	0.191	4.7	0.101833	475.08	1192.9
Synchronous	Manduca sexta	3.014	11.3	0.234	1581.67	605.096
Synchronous	Manduca sexta	1.838	11.3	0.243333	1644	1031.36
Synchronous	Manduca sexta	2.94	11.3	0.244	1332	522.407
Synchronous	Manduca sexta	2.022	11.3	0.262167	1050.67	599.151
Synchronous	Manduca sexta	2.043	11.3	0.248	1425.67	804.641
Asynchronous	Xylocopa californica	0.722	7.6	0.0971667	2510.33	2696.38
Asynchronous	Xylocopa californica	0.736	7.6	0.0961667	1885	1986.19
Asynchronous	Xylocopa californica	0.684	7.6	0.0958333	2084	2362.81
Asynchronous	Xylocopa californica	0.82	7.6	0.0986667	2829	2675.51
Asynchronous	Xylocopa californica	0.677	7.6	0.0968333	2925.67	3351.38
Asynchronous	Bombus centralis	0.12	3.9	0.0391	888.333	2946
Asynchronous	Bombus centralis	0.136	3.9	0.0367	977.333	2859.84
Asynchronous	Bombus centralis	0.121	3.9	0.0383333	1128	3709.9
Asynchronous	Bombus centralis	0.092	3.9	0.0335833	1003	4338.62
Asynchronous	Bombus centralis	0.121	3.9	0.0336833	868.333	2855.88
Asynchronous	Musca domestica	0.01339	2	0.035225	319.6	5004.5
Asynchronous	Musca domestica	0.01094	2	0.0354333	248.6	5307.24
Asynchronous	Musca domestica	0.01071	2	0.0348167	329.7	6332.69
Asynchronous	Musca domestica	0.01039	2	0.0344167	228.7	4489.53
Asynchronous	Musca domestica	0.01027	2	0.0349833	410.1	8227.43
